# Supplementary material for: Transcriptome Analysis Unveils the Effects of Proline on Gene Expression in the Yeast Komagataella phaffii
Source: MDPI journal article supplement (doi:10.3390/microorganisms10010067), 2021-12-29
Supplement: s1 [file s1]

Table S1. Sequences of primers (5'-3') used in the study

| Name           | Sequence                                              |
|----------------|-------------------------------------------------------|
| ZeoDownstr     | AGTTGACCAGTGCCGTTC                                    |
| ZeoUpstr       | CGGCGTACAGCTCGTC                                      |
| KpGAP1.1-5F    | CTCGAGATTCACAAGGCTGCATTAGA                            |
| KpGAP1.1-5R    | CCCAGGATCCAAATCAACTTAGCGGTCCAT                        |
| KpGAP1.1-3F    | ATTTGGATCCTGGGTACTGAAGTGTGTGG                         |
| KpGAP1.1-3R    | CTCGAGGTTTCTAATTGCTCGTGCT                             |
| KpGAP1.2-5F    | CCCTAGGAGGAATCCGATCTAGAGA                             |
| KpGAP1.2-5R    | GCACGGATCCGTTTGCGACTGGTGATTAC                         |
| KpGAP1.2-3F    | AAACGGATCCGTGCTGATCTTTGTAGTGACC                       |
| KpGAP1.2-3R    | CCTAGGTGAGTAAGGAGGGTAGGAAG                            |
| KpGAP1.3-5F    | CTCGAGTGAGGTCGCTCTTTAGTCTG                            |
| KpGAP1.3-5R    | CCAGGGATCCTCATTATAAGATAGTTGTGTTGACG                   |
| KpGAP1.3-3F    | ATGAGGATCCCTGGCTGTTAGCTCTCTCC                         |
| KpGAP1.3-3R    | CTCGAGCGTGACTTTATGCTGTGTGT                            |
| KpPUT4.1-5F    | CTCGAGCGACTATCGGTCTTGTTAGG                            |
| KpPUT4.1-5R    | ATAAGGATCCCTGTGGAGAGGAAGTCAAAC                        |
| KpPUT4.1.3F    | CAGGGATCCTTATTGCTGCTTATGTTACTATCC                     |
| KpPUT4.1.3R    | CTCGAGAATGTGCCCAAGACGAC                               |
| KpPUT4.2-5F    | CTCGAGCCCATACACTTGTCGTAAACT                           |
| KpPUT4.2-5R    | GAATGGATCCCAGTCAGATCATTAAGCCA                         |
| KpPUT4.2-3F    | CTGGGATCCATTCCTAAGGTCGCTTCATC                         |
| KpPUT4.2-3R    | CTCGAGCTACGGAGGGAAAGAAAGAC                            |
| testKpGAP1.1-5 | AGTTAGCCCAATGTCAAGAA                                  |
| testKpGAP1.2-5 | AAACGACCTCAGAGACAGAA                                  |
| testKpGAP1.3-5 | TACGGATAACGACACTGTGA                                  |
| testKpPUT4.1-5 | GTGTCAGATATCACGTGCAG                                  |
| testKpPUT4.2-3 | AGATCAACTGGATCGTCAAC                                  |
| PPUT1-F-SacI   | ATTACAGAGCTCTACGCATCTGCTATGGA                         |
| PPUT1-R        | GAATAAACAACAGATTTAAACATTTATGACTGTATTACTG<br>AGTAATAAA |
| PHO5-F         | ATGTTTAAATCTGTTGTTTATTCAA                             |
| PHO5-R-AvrII   | ATTACACCTAGGAAAACATTGTCTCAATAGACTGG                   |
