# Supplementary material for: Transcriptome Analysis Unveils the Effects of Proline on Gene Expression in the Yeast Komagataella phaffii
Source: MDPI journal article supplement (doi:10.3390/microorganisms10010067), 2021-12-29
Supplement: s1 [file s1]

Table S2. Number of reads for each sample analyzed by RNA-sequencing

| Sample | Medium (biomass growth / induction) | Number of reads |
|--------|-------------------------------------|-----------------|
| N1     | BMGN / BMMN                         | 449 310         |
| N2     | BMGN / BMMN                         | 569 501         |
| N3     | BMGN / BMMN                         | 831 178         |
| P1     | BMGP / BMMP                         | 432 625         |
| P2     | BMGP / BMMP                         | 487 735         |
| P3     | BMGP / BMMP                         | 648 008         |
