# Supplementary material for: Transcriptome Analysis Unveils the Effects of Proline on Gene Expression in the Yeast Komagataella phaffii
Source: MDPI journal article supplement (doi:10.3390/microorganisms10010067), 2021-12-29
Supplement: s1 [file s1]

The analysis of the phenotypes of *K. phaffii* strains carrying the deletions in permease genes

|               | Glycerol                                                                          |                                                                                   | Methanol                                                                           |                                                                                     |
|---------------|-----------------------------------------------------------------------------------|-----------------------------------------------------------------------------------|------------------------------------------------------------------------------------|-------------------------------------------------------------------------------------|
|               | Ammonium sulphate                                                                 | Proline                                                                           | Ammonium sulphate                                                                  | Proline                                                                             |
| tr2-1-GS115   |  |  |  |  |
| Δgap1.1-GS115 |  |  |  |  |
| Δgap1.2-GS115 |  |  |  |  |
| Δgap1.3-GS115 |  |  |  |  |
| Δput4.1-GS115 |  |  |  |  |
| Δput4.2-GS115 |  |  |  |  |

**Figure S2a.** Growth of *K. phaffii* strains Δgap1.1-GS115, Δgap1.2-GS115, Δgap1.3-GS115, Δput4.1-GS115, Δput4.2-GS115 and control tr2-1-GS115 strain on media with glycerol or methanol as the main carbon source. Ammonium sulfate or proline was used as the only nitrogen source.

|               | Citrulline                                                                          |                                                                                      |
|---------------|-------------------------------------------------------------------------------------|--------------------------------------------------------------------------------------|
|               | Glycerol                                                                            | Methanol                                                                             |
| tr2-1-GS115   |    |    |
| Δgap1.1-GS115 |  |  |
| Δgap1.2-GS115 |  |  |
| Δgap1.3-GS115 |  |  |

**Figure S2b.** Growth of *K. phaffii* strains Δgap1.1-GS115, Δgap1.2-GS115, Δgap1.3-GS115 and control tr2-4-GS115 strain on media with glycerol or methanol as carbon source. Citrulline was used as the only nitrogen source.
